# Supplementary material for: Long‐Term Safety and Efficacy of Mavacamten in Symptomatic Obstructive Hypertrophic Cardiomyopathy: Interim Results of the PIONEER‐OLE Study
Source: PubMed Central journal article supplement — J Am Heart Assoc. 2024 Apr 9;13(8):e030607. doi: 10.1161/JAHA.123.030607 (PMC11262496; doi:10.1161/jaha.123.030607), 2024-04-09
Supplement: JAH3-13-e030607-s001.pdf [file JAH3-13-e030607-s001.pdf]

# **SUPPLEMENTAL MATERIAL**

**Table S1. Mavacamten Dose by Visit (Safety Population).**

| Patient                | Mavacamten dose, mg/day |                |          |          |          |
|------------------------|-------------------------|----------------|----------|----------|----------|
|                        | Baseline                | Week 6         | Week 156 | Week 180 | Week 204 |
| Patient 1              | 5                       | 15             | 15       | 15*      | ND       |
| Patient 2              | 5                       | 10             | 10       | 10       | ND       |
| Patient 3              | 5                       | 5              | 5        | 5        | ND       |
| Patient 4              | 5                       | 10             | 5        | 5        | 5        |
| Patient 5              | 5                       | 5 <sup>†</sup> | –        | –        | –        |
| Patient 6              | 5                       | 5              | 5        | 5        | ND       |
| Patient 7              | 5                       | 15             | 10       | 10       | 10       |
| Patient 8 <sup>‡</sup> | 5                       | 10             | 10       | 10       | 10       |
| Patient 9              | 5                       | 10             | 10       | 10       | 10       |
| Patient 10             | 5                       | 15             | 15       | 10**     | 10       |
| Patient 11             | 5                       | 5              | 5        | 5        | ND       |
| Patient 12             | 5                       | 10             | 10       | 10       | ND       |
| Patient 13             | 5                       | 10             | 10       | 10       | ND       |

ND indicates no data available.

Patient numbers here are not related to patient numbers in Supplemental Tables 3 and 4.

\*Dose at week 184.

<sup>†</sup>Patient discontinued treatment at week 26.

<sup>‡</sup> Patient had a dose increase by error from 10 mg to 15 mg at an unscheduled visit at week 74. The dose was subsequently decreased to 10 mg at week 75. This was noted as a protocol deviation.

\*\*Dose at week 188.

**Table S2. Exposure-Adjusted Incidence of TEAEs by ECI and SSs (Safety Population).**

| <b>ECI/SS category</b><br><b>Preferred term</b> | <b>Mavacamten</b><br><b>(n=13)</b>  |                                  |                                                                               |
|-------------------------------------------------|-------------------------------------|----------------------------------|-------------------------------------------------------------------------------|
|                                                 | <b>Number</b><br><b>of patients</b> | <b>Patient-</b><br><b>years*</b> | <b>Exposure-adjusted</b><br><b>incidence, per 100</b><br><b>patient-years</b> |
| Patients with at least one ECI                  | 12                                  | 18.4                             | 65.15                                                                         |
| Major adverse cardiovascular events             | 2                                   | 43.6                             | 4.58                                                                          |
| Subdural hematoma                               | 1                                   | 46.8                             | 2.14                                                                          |
| Troponin increased                              | 1                                   | 44.1                             | 2.27                                                                          |
| Atrial fibrillation                             | 1                                   | 46.0                             | 2.17                                                                          |
| Syncope/presyncope [broad]                      | 2                                   | 39.6                             | 5.06                                                                          |
| Dizziness                                       | 2                                   | 39.6                             | 5.06                                                                          |
| Orthostatic hypotension                         | 1                                   | 44.9                             | 2.23                                                                          |
| Cardiac failure                                 | 1                                   | 46.7                             | 2.14                                                                          |
| Ejection fraction decreased                     | 1                                   | 46.7                             | 2.14                                                                          |
| Orthostatic Hypotension                         | 1                                   | 44.9                             | 2.23                                                                          |
| QTc prolongation                                | 1                                   | 46.9                             | 2.13                                                                          |
| Hepatic events                                  | 2                                   | 46.8                             | 4.27                                                                          |
| Alanine aminotransferase increased              | 1                                   | 47.0                             | 2.13                                                                          |
| Aspartate aminotransferase increased            | 1                                   | 47.1                             | 2.12                                                                          |
| Dizziness (ECI)                                 | 4                                   | 32.9                             | 12.16                                                                         |
| Dizziness postural                              | 3                                   | 38.7                             | 7.74                                                                          |
| Dizziness                                       | 2                                   | 39.6                             | 5.06                                                                          |
| Dizziness exertional                            | 1                                   | 43.6                             | 2.29                                                                          |
| Accidents and injuries                          | 3                                   | 38.3                             | 7.84                                                                          |
| Fall                                            | 2                                   | 41.4                             | 4.83                                                                          |
| Ligament sprain                                 | 1                                   | 43.7                             | 2.29                                                                          |
| Lumbar vertebral fracture                       | 1                                   | 44.1                             | 2.27                                                                          |
| Spinal compression fracture                     | 1                                   | 44.1                             | 2.27                                                                          |
| Accidents and injuries (SAEs)                   | 1                                   | 44.1                             | 2.27                                                                          |
| Lumbar vertebral fracture                       | 1                                   | 44.1                             | 2.27                                                                          |
| Spinal compression fracture                     | 1                                   | 44.1                             | 2.27                                                                          |

|                         |   |      |      |
|-------------------------|---|------|------|
| Gastrointestinal events | 4 | 40.5 | 9.89 |
| Diarrhea                | 2 | 44.1 | 4.54 |
| Abdominal discomfort    | 1 | 44.8 | 2.23 |
| Abdominal pain          | 1 | 43.9 | 2.28 |
| Abdominal pain upper    | 1 | 47.1 | 2.12 |
| Constipation            | 1 | 47.2 | 2.12 |
| Nausea                  | 1 | 44.9 | 2.23 |
| Vomiting                | 1 | 44.9 | 2.23 |
| Hypersensitivity        | 3 | 42.8 | 7.01 |
| Dermatitis contact      | 2 | 43.2 | 4.63 |
| Eczema                  | 1 | 46.8 | 2.14 |
| Eczema nummular         | 1 | 45.7 | 2.19 |
| Ventricular tachycardia | 1 | 44.2 | 2.26 |

---

ECI indicates event of clinical interest; QTc, corrected QT interval; SAE, serious adverse event; SS, special situation; TEAE, treatment-emergent adverse event.

\*For exposure-adjusted incidence rates, the exposure time to first event was calculated as total duration of exposure up to the first occurrence of the event. For participants with no event, the time was censored at the last follow-up time within the treatment-emergent period. For participants with multiple events, the time to first event was considered.

**Table S3. Selected individual data at baseline, week 12 and week 16 for the parent study PIONEER-HCM and at baseline for the extension study PIONEER-OLE.**

| Patient | NT-proBNP, ng/L |         |         | Valsalva LVOT gradient, mm Hg |             |         |         | LVEF, resting, % |             |         |         |             |
|---------|-----------------|---------|---------|-------------------------------|-------------|---------|---------|------------------|-------------|---------|---------|-------------|
|         | PIONEER-HCM     |         |         | PIONEER-OLE                   | PIONEER-HCM |         |         | PIONEER-OLE      | PIONEER-HCM |         |         | PIONEER-OLE |
|         | Baseline        | Week 12 | Week 16 | Baseline                      | Baseline    | Week 12 | Week 16 | Baseline         | Baseline    | Week 12 | Week 16 | Baseline    |
| 1       | 90              | 22      | 248     | 176                           | 111         | 22      | 70      | 77               | 74          | 70      | 75      | 76          |
| 2       | 679             | 170     | 990     | 745                           | 70          | 41      | 38      | 98               | 73          | 75      | ND      | 77          |
| 3       | 835             | 198     | 1307    | 1382                          | 54          | 18      | 81      | 67               | 76          | 65      | 65      | 73          |
| 4       | 660             | 27      | 65      | 545                           | 176         | 5       | 20      | ND               | 65          | 51      | 67      | 65          |
| 5       | 1551            | 233     | 152     | 559                           | 118         | 5       | 10      | 91               | 67          | 52      | 61      | 66          |
| 6       | 183             | 1018    | 739     | 172                           | 65          | 7       | 8       | 32               | 70          | 50      | 64      | 65          |
| 7       | 91              | 50      | 331     | 384                           | 108         | 19      | 103     | 67               | 69          | 63      | 67      | 67          |
| 8       | 9680            | 1199    | 4734    | 3908                          | 159         | 124     | 196     | 156              | 72          | 73      | 77      | 77          |
| 9       | 5796            | 2516    | 8678    | 7736                          | 97          | 89      | 93      | 114              | 73          | 73      | 73      | 69          |
| 10      | 4165            | 2905    | 5133    | 5135                          | ND          | 76      | 141     | 107              | 70          | 77      | 74      | 79          |

|    |     |     |     |     |     |    |    |     |    |    |    |    |
|----|-----|-----|-----|-----|-----|----|----|-----|----|----|----|----|
| 11 | 789 | 41  | 69  | 351 | 109 | 6  | 10 | 103 | 77 | 50 | 68 | 74 |
| 12 | 36  | 20  | 40  | 42  | 60  | 26 | 31 | 94  | 76 | 68 | ND | 76 |
| 13 | 457 | 494 | 467 | 704 | 103 | 41 | 16 | 72  | 75 | 74 | 80 | 72 |

LVEF indicates left ventricular ejection fraction; LVOT, left ventricular outflow tract; ND, no data available; NT-proBNP, N-terminal pro-B-type natriuretic peptide.

Patient numbers here are not related to patient numbers in Supplemental Tables 1 and 4.

**Table S4. Individual Resting LVOT Gradients  $\geq 30$  mm Hg and Valsalva Gradients  $\geq 50$  mm Hg at Week 180, and Post-exercise LVOT Gradients  $\geq 50$  mm Hg at Week 156 (Safety Population).**

| <b>Week 180</b>                                               |                                                                | <b>Week 156</b>                                                     |
|---------------------------------------------------------------|----------------------------------------------------------------|---------------------------------------------------------------------|
| <b>Resting LVOT gradient <math>\geq 30</math> mm Hg (n=3)</b> | <b>Valsalva LVOT gradient <math>\geq 50</math> mm Hg (n=1)</b> | <b>Post-exercise LVOT gradient <math>\geq 50</math> mm Hg (n=2)</b> |
| 65 (Patient 1)                                                | 72 (Patient 1)                                                 | 80 (Patient 1)                                                      |
| 34 (Patient 2)                                                |                                                                | 72 (Patient 2)                                                      |
| 40 (Patient 3)                                                |                                                                |                                                                     |

LVOT indicates left ventricular outflow tract.

Data shown were read by the central cardiac laboratory and are presented as LVOT gradient in mm Hg (patient). Patient numbers here are not related to patient numbers in Supplemental Tables 1 and 3.

**Figure S1. Mean (SD) KCCQ-OSS by visit.**

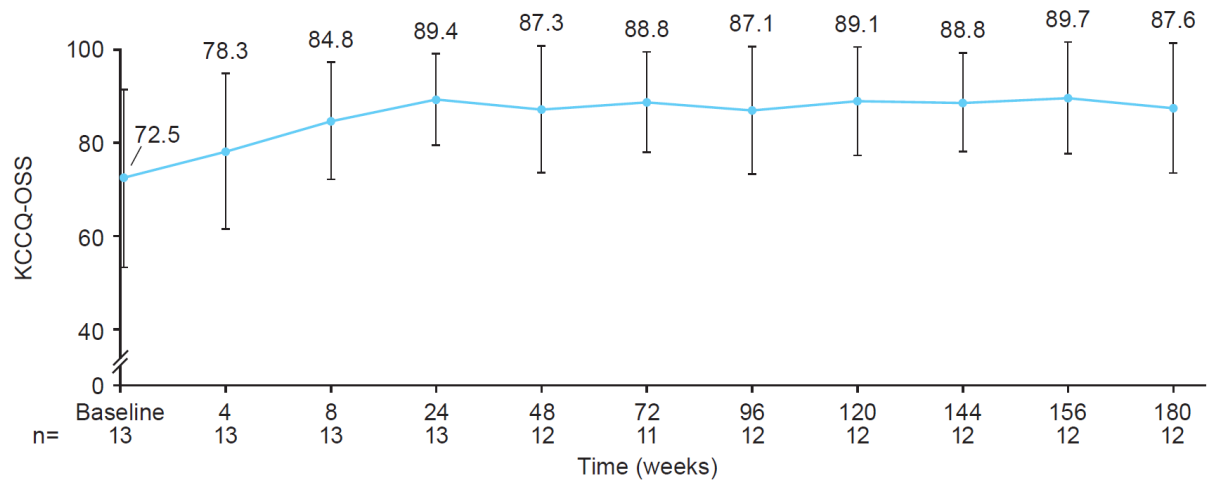

KCCQ-OSS indicates Kansas City Cardiomyopathy Questionnaire-Overall Summary Score;  
SD, standard deviation.



**Figure S2. Individual serum NT-proBNP levels by visit.**

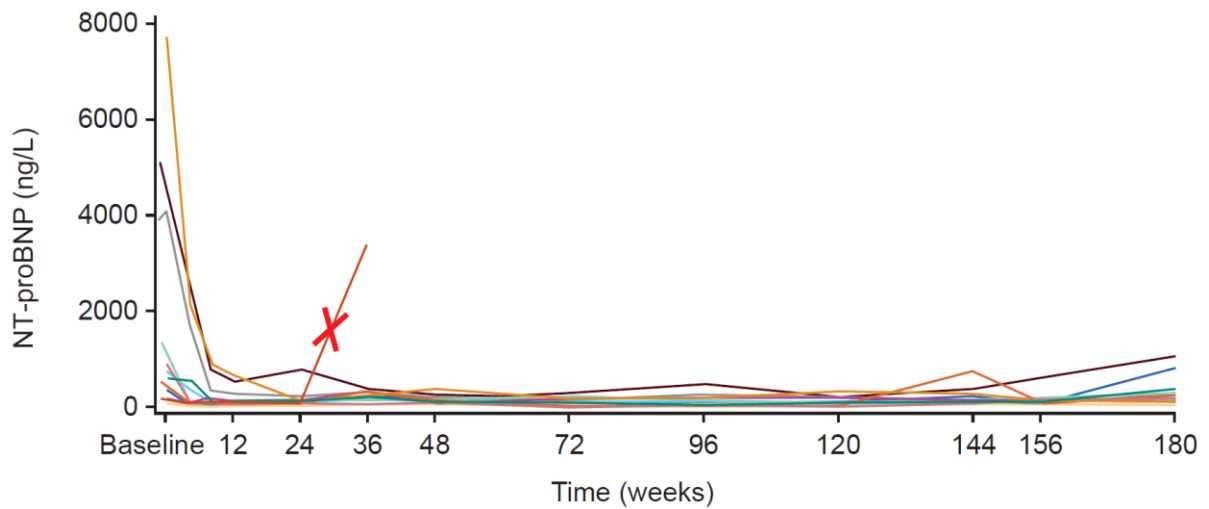

The patient with an elevated value at Week 36 discontinued study treatment at week 26 owing to a serious adverse event unrelated to the study drug (cholangiocarcinoma). The two patients with elevated values at Week 180 were off treatment at the time of the visit (one due to subdural hematoma and one due to LVEF<50%). They both resumed treatment subsequently.

NT-proBNP indicates N-terminal pro-B-type natriuretic peptide.

**Figure S3. Individual echocardiographic outcomes by visit.**

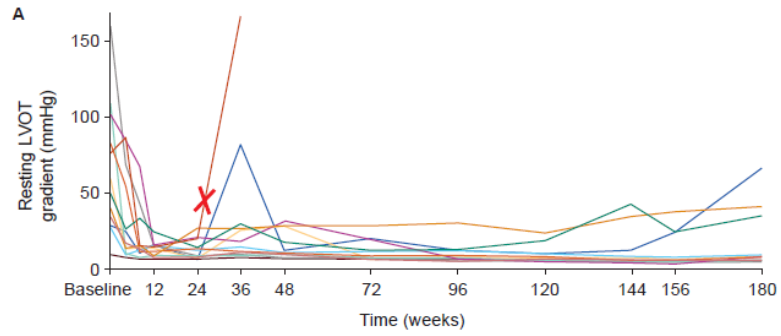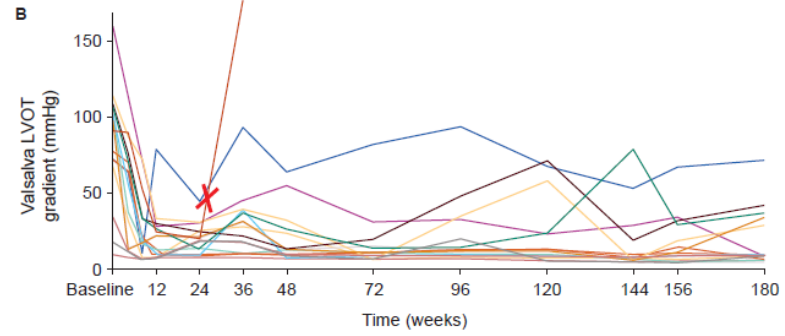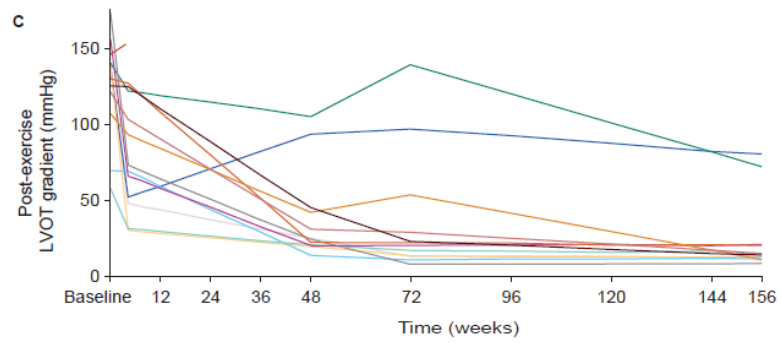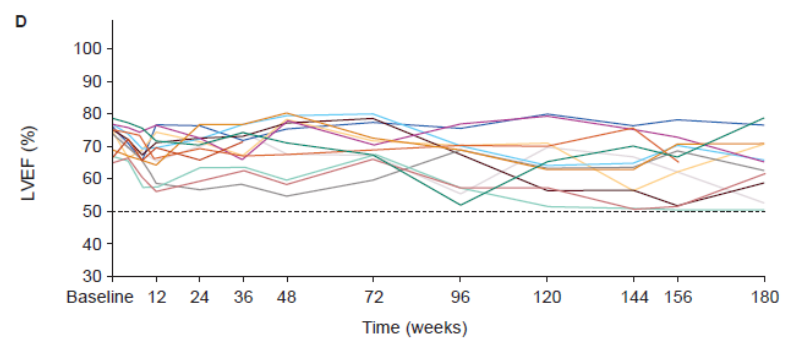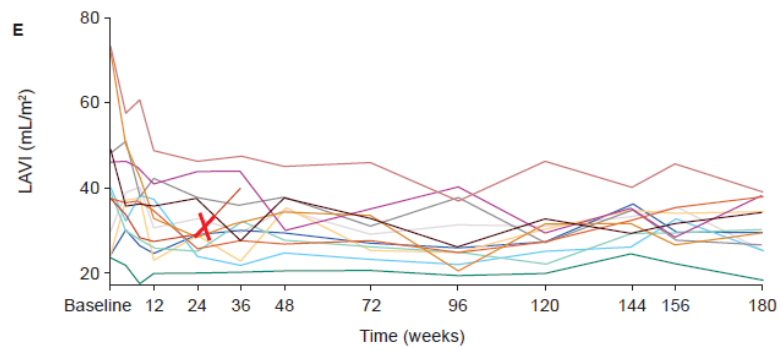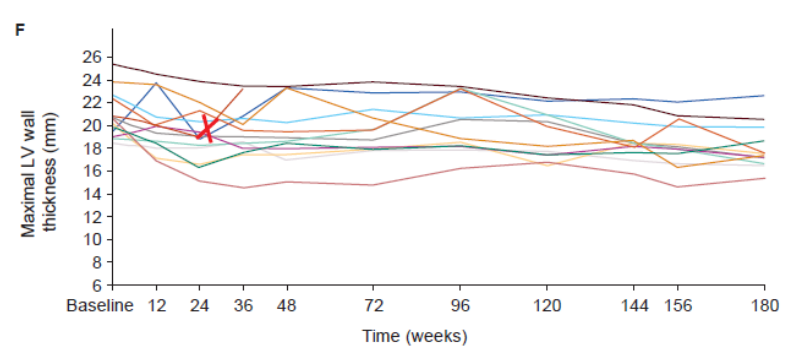

**A**, Resting LVOT gradient. **B**, Valsalva LVOT gradient. **C**, Post-exercise LVOT gradient. **D**, LVEF. **E**, LAVI. **F**, Maximal left ventricular wall thickness. Dashed line on part D indicates a left ventricular ejection fraction of 50% (considered to be the threshold for left ventricular systolic dysfunction). The patient with elevated LVOT gradients at Week 36 discontinued study treatment at week 26 owing to a serious adverse event unrelated to the study drug (cholangiocarcinoma). Two patients were off treatment at the time of the Week 180 visit (one due to subdural hematoma and one due to LVEF<50%). They both resumed treatment subsequently. LAVI indicates left atrial volume index; LVEF, left ventricular ejection fraction; LVOT, left ventricular outflow tract; NT-proBNP, N-terminal pro-B-type natriuretic peptide; QTc, corrected QT interval.

**Figure S4. Mean (SD) E/e' lateral ratio by visit.**

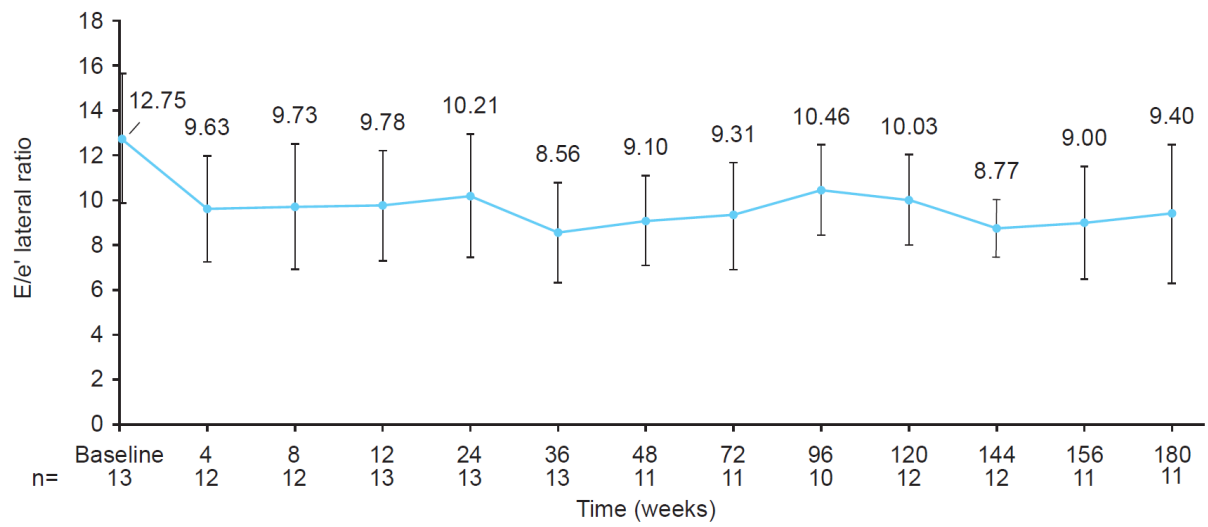

E/e' indicates the ratio between early mitral inflow velocity and mitral annular early diastolic velocity; SD, standard deviation.
